# Supplementary material for: Solid-State Lithium Battery Cycle Life Prediction Using Machine Learning
Source: MDPI journal article supplement (doi:10.3390/app11104671), 2021-05-20
Supplement: s1 [file s1]

Archive with 1 entries (1 files):
- applsci-1168244-supplementary.pdf
