# Supplementary material for: Solid-State Lithium Battery Cycle Life Prediction Using Machine Learning
Source: MDPI journal article supplement (doi:10.3390/app11104671), 2021-05-20
Supplement: s1 [file s1 › applsci-1168244-supplementary.pdf]

## Supplementary

Table S1. 30 available features

|                                                            | Features                                                                                                | savgol_filter<br>used | Index   |
|------------------------------------------------------------|---------------------------------------------------------------------------------------------------------|-----------------------|---------|
| Charge/discharge<br>capacity                               | Charge specific capacity                                                                                |                       | (1)     |
|                                                            | Discharge specific capacity                                                                             |                       | (2)     |
|                                                            | Coulombic efficiency                                                                                    |                       | (3)     |
|                                                            | Capacity difference                                                                                     |                       | (4)     |
| Charge/discharge<br>energy                                 | The integral of capacity and voltage charging<br>curve                                                  |                       | (5)     |
|                                                            | The integral of capacity and voltage discharging<br>curve                                               |                       | (6)     |
|                                                            | Charge energy / discharge energy                                                                        |                       | (7)     |
|                                                            | Charge energy - discharge energy                                                                        |                       | (8)     |
| Voltage                                                    | Average charging voltage                                                                                |                       | (9)     |
|                                                            | Average discharging voltage                                                                             |                       | (10)    |
|                                                            | Take the voltage data at the beginning and end<br>when step model is “standing” at charging step.       |                       | (11-12) |
|                                                            | Take the voltage data at the beginning and end<br>when step model is “standing” at discharging<br>step. |                       | (13-14) |
| Difference between<br>charging and<br>discharging<br>curve | Minimum                                                                                                 | √                     | (15)    |
|                                                            | Maximum                                                                                                 | √                     | (16)    |
|                                                            | Mean                                                                                                    | √                     | (17)    |
|                                                            | Variance                                                                                                | √                     | (18)    |
|                                                            | Skewness                                                                                                | √                     | (19)    |

|                               |                                                                      |   |         |
|-------------------------------|----------------------------------------------------------------------|---|---------|
|                               | Kurtosis                                                             | √ | (20)    |
| Locally convex coordinates    | Locally convex coordinates of voltage and capacity charging curve    | √ | (21-24) |
| of voltage and capacity curve | Locally convex coordinates of voltage and capacity discharging curve | √ | (25-28) |
| Charge/discharge time         | Charging time                                                        |   | (29)    |
|                               | Discharging time                                                     |   | (30)    |
